# Supplementary material for: Outcome of Second Primary Malignancies Developing in Multiple Myeloma Patients
Source: MDPI journal article supplement (doi:10.3390/cancers15174359), 2023-09-01
Supplement: s1 [file s1]

**Table S1. (A) .SPM subtypes;.**

| SPM subtype                                    | Number of patientss |
|------------------------------------------------|---------------------|
| <b>Solid-SPMs</b>                              |                     |
| Stage 1(n=31), stage 2(n=14), stage 3-4 (n=47) | 113                 |
| Bladder Cancer                                 | 9                   |
| Prostate Cancer                                | 10                  |
| Thyroid Cancer                                 | 2                   |
| Uterine Cancer                                 | 7                   |
| Gastric Cancer Colon Cancer                    | 8                   |
|                                                |                     |
|                                                |                     |
| Rare solid                                     | 6                   |
| Breast Cancer                                  | 9                   |
| Hepatoma                                       | 3                   |
| Ovarian                                        | 1                   |
| Colorectal Cancer                              | 17                  |
| Renal Cancer                                   | 3                   |
| Lung Cancer                                    | 16                  |
|                                                |                     |
| Melanoma                                       | 9                   |
| Oral and Oropharyngeal Cancer                  | 4                   |
| Pancreatic Cancer                              | 9                   |
| <b>Hematological</b>                           | 52                  |
| MDS+AML+MPN                                    | 36                  |
| Lymphoblastic Leukemia*                        | 5                   |
| Lymphoma                                       | 11                  |
| <b>TOTAL</b>                                   | <b>165</b>          |

SPM – second primary neoplasm; MDS-myelodysplastic syndrome; AML-acute myeloblastic leukemia; MPN- myeloproliferative neoplasm. \*including one patient with biphenotypic leukemia.

**Table S1. (B) Cytogenetic and molecular changes detected in 23 patients diagnosed with AML (n=), ALL(2), MDS() and MPN(2).**

| Diagnosis                                  | Genetic abnormalities                                                                                                                                                                                                                                                       |
|--------------------------------------------|-----------------------------------------------------------------------------------------------------------------------------------------------------------------------------------------------------------------------------------------------------------------------------|
| CMML                                       | BCR/ABL Negative-; Karyotype 46,XY [5]                                                                                                                                                                                                                                      |
| MDS                                        | complex karyotupe add (3q25); del 9q (21q22); del 16q21q22)                                                                                                                                                                                                                 |
| B-ALL                                      | tetrasomy 9,11 ,12                                                                                                                                                                                                                                                          |
| MDS                                        | del7                                                                                                                                                                                                                                                                        |
| MDS                                        | TP53 mutation, mnosomy 5 and 12, loss of Y-Chromosome in all examed cell-metaphases                                                                                                                                                                                         |
| AML preceded by MDS                        | DNMT3A mutation, SF3B1 mutation, complex aberrant karyotype                                                                                                                                                                                                                 |
| MDS                                        | DNMT3A mutation, SF3B1 mutation, EZHZD mutation, TET2 mutation, complex aberrant karyotype                                                                                                                                                                                  |
| B-ALL                                      | Ph negativ, Del9p21 (CDKN2A-gene), Del20q12 (PTPRT), Deletion long arm of Chromosome 9, Monosomy 20, and Trisomy 21                                                                                                                                                         |
| AML preceded by MDS                        | RUNX1 mutation, EZH2 mutation, complex aberrant karyotype                                                                                                                                                                                                                   |
| AML preceded by MDS                        | Addition of 2 copies in region 11q22.3 (ATM) no other aberrations were found.                                                                                                                                                                                               |
| Biphenotypic leukemia pre-<br>ceded by MDS | RUNX1 mutation, EZH2 mutation, complex aberrant karyotype.                                                                                                                                                                                                                  |
| MDS                                        | karyotype: 43,XX,del(5q),-7,der(17)del(17)(p13)t(13;17)(q14;p13),der(21q;18q)[8]/46,XX[38]. nuc ish(TP53x1,MPOx2)[43/85]// Molecular finding: Frecuencia alélica 8,4 % Gen TP53. c.578A>G(NM_000546.5)(p.H193R)                                                             |
| MDS                                        | karyotype: 45,XX,-7,t(9;22)(q34;q11)[3]/45,X,t(X;11)(q13;p15),-7,t(9;22)(q34;q11)[19]/45,X,del(X)(q?),-7,t(9;22)(q34;q11)[5]/ 46,XX,-7,t(9;22)(q34;q11)+mar[3]//molecular finding: Ratio BCR-ABL1/ABL1 p210 (IS): 12.4931, Gen WT1: cuantificación de expresión (%): 220.37 |

|                                                                                                                                                                                                                                                                                                                         |                                                                                                                                                                                                                                                                                                                                                                                                                                                                                                         |
|-------------------------------------------------------------------------------------------------------------------------------------------------------------------------------------------------------------------------------------------------------------------------------------------------------------------------|---------------------------------------------------------------------------------------------------------------------------------------------------------------------------------------------------------------------------------------------------------------------------------------------------------------------------------------------------------------------------------------------------------------------------------------------------------------------------------------------------------|
| MDS                                                                                                                                                                                                                                                                                                                     | karyotype: 46,XY,der(3)t(3;6),del(5q),-6,del(6q),der(7)t(3;7)del(7q13q36),add(16p),add(17p),der(21)[cp14]/46,XY[11]// molecular finding: Frecuencia alélica 24.75%. Gen TP53. c.733G>A(NM_000546.5)(p.G245S)                                                                                                                                                                                                                                                                                            |
| MDS                                                                                                                                                                                                                                                                                                                     | 46,XY, del (7)(q11,2q22)[3]                                                                                                                                                                                                                                                                                                                                                                                                                                                                             |
| AML preceded by MDS                                                                                                                                                                                                                                                                                                     | 45 ~ ?47 ,XX,-5,del(6)(q2? lq2?5),-7 ,add(8)(q24), +mar1, +mar,inc[cp9] .                                                                                                                                                                                                                                                                                                                                                                                                                               |
| AML preceded by MDS                                                                                                                                                                                                                                                                                                     | 46,XY[3].nuc ish(TP53,D17Z1)x2[500]                                                                                                                                                                                                                                                                                                                                                                                                                                                                     |
| AML preceded by MDS                                                                                                                                                                                                                                                                                                     | 43 ,X,-Y ,add(7)(p22),-13 ,-16,add(1 7)(p 11.2) ,-19 ,-21, +mar1,+ mar2, + mar3, +mar4, +mar5, + mar6,+ 2 ~ 3mar[cp 12]/43,X,-Y ,add(7)(p22),add(13)(p 11.2),-16,-17 ,add(1 7)(pl 1.2),-19,-21, +mar1, +mar2, +mar3,+ mar4, + 1 ~ 4mar[cp10]/43,X,-Y ,del(2)(q3? 1),add(7)(p22),add(1 l)(p 15),der(13; 13)(q 10;q10),-16,add(1 7)(pl 1.2), add(1 7)(pl 1 .2),-19,-2 1, +mar1, +mar2, +mar4[cp3]/43,X,-Y,add(7)(p22),add(12)(pl3),-13,-16,-17,add(1 7)(pl 1.2),-19,-21, +mar1, +mar4, +mar5[2]/46,XY[5]. |
| AML                                                                                                                                                                                                                                                                                                                     | 46,XY                                                                                                                                                                                                                                                                                                                                                                                                                                                                                                   |
| ET                                                                                                                                                                                                                                                                                                                      | No BCR-ABL1 fusion transcript; c.1849G>T (p.V617F) mutation in JAK2 gen in 98% of alleles in the sample                                                                                                                                                                                                                                                                                                                                                                                                 |
| MDS                                                                                                                                                                                                                                                                                                                     | karyotype:<br>45,XX,-3,del(5)(q14q34),der(14)t(14;17)(p13;q11),-17,+r[2]<br>46,sl,+21[4]<br>44,XX,-3,del(5),-7,der(12;14)(q10;q10),+r[4]<br>46,XX[1]                                                                                                                                                                                                                                                                                                                                                    |
| AML                                                                                                                                                                                                                                                                                                                     | karyotype:<br>45,XY,-7,del(12)(p11p12),del(13)(q13q21)[6]<br>46,XY[4]                                                                                                                                                                                                                                                                                                                                                                                                                                   |
| MDS                                                                                                                                                                                                                                                                                                                     | karyotype:<br>43-46,XY,der(3;7)(q10;q10)[2],-5[5],-7[1],add(7)(p11)[3],-17[5],-19[3],del(21)(q11q21),+r[1],+mar1[4],+mar2[1][cp6]<br>46,XY[4]                                                                                                                                                                                                                                                                                                                                                           |
| Cytogenetic/ molecular data were available for 23 out of the 41x patients diagnosed with these malignancies. B-ALL- B acute lymphoblastic leukemia; AML- acute myeloid leukemia; CMML chronic myelomonocytic leukemia;-ET-essential thrombocytosis; MDS - myelodysplastic syndrome; MPN - myeloproliferative neoplasms. |                                                                                                                                                                                                                                                                                                                                                                                                                                                                                                         |

**Table S2.** (A). Univariate analysis - Factors Predicting time to Solid-SPM since MM diagnosis.

|                                            | HR   | CI95%     | P                |
|--------------------------------------------|------|-----------|------------------|
| Age <65 ≥65 (years)                        | 2.77 | 1.84-4.15 | <b>&lt;0.001</b> |
| Sex (Females)                              |      |           |                  |
| Males                                      | 1.45 | 0.99-2.15 | 0.053            |
| Prior cancer history                       | 2.03 | 1.05-3.93 | <b>0.034</b>     |
| Concomitant T2DM                           | 1.65 | 1.05-2.60 | <b>0.029</b>     |
| Number of concomitant comorbidities (0)    |      |           |                  |
| 1                                          | 1.63 | 1.00-2.67 | 0.05             |
| 2                                          | 1.48 | 0.88-2.49 | 0.14             |
| 3                                          | 1.31 | 0.73-2.34 | 0.37             |
| Creatinine level ≥ 1.3(mg/dL)              | 1.10 | 0.71-1.68 | 0.68             |
| Hemoglobin ≥12 (gr/dL)                     | 0.72 | 0.47-1.08 | 0.11             |
| Platelets >150 (10 <sup>9</sup> /L)        | 0.59 | 0.34-1.04 | 0.067            |
| Albumin level ≥3.5 (g/dL)                  | 0.74 | 0.49-1.14 | 0.17             |
| B <sub>2</sub> Mmicroglobulin ≥ 5.5 (mg/L) | 1.81 | 1.14-2.87 | <b>0.012</b>     |
| ISS (1)                                    |      |           |                  |
| 2                                          | 1.27 | 0.75-2.14 | 0.37             |
| 3                                          | 1.63 | 0.97-2.74 | 0.067            |
| Any prior chemotherapy for MM              | 0.68 | 0.45-1.02 | 0.06             |
| Any prior IMiD                             | 0.86 | 0.50-1.50 | 0.6              |
| Any prior PI                               | 1.02 | 0.66-1.57 | 0.93             |
| Any maintenance therapy                    | 1.11 | 0.75-1.64 | 0.61             |
| Maintenance with IMiD                      | 0.97 | 0.64-1.48 | 0.89             |
| Prior AutoHCT                              | 0.65 | 0.44-0.96 | <b>0.03</b>      |
| Number of prior lines ≤2 vs ≥3             | 0.38 | 0.25-0.58 | <b>&lt;0.001</b> |

|             |      |           |              |
|-------------|------|-----------|--------------|
| ECOG PS (0) |      |           |              |
| 1           | 1.47 | 0.87-2.47 | 0.15         |
| 2           | 2.01 | 1.09-3.69 | <b>0.025</b> |
| 3           | 0.69 | 0.3-1.58  | 0.38         |
| 4           | 0.47 | 0.06-3.53 | 0.47         |

AutoHCT- Autologous hematopoietic cell transplantation; B2M- B2 Microglobulin; ECOG PS - ECOG Performance Status; IMiD- immunomodulating agents; ISS- International Staging System; MM- multiple myeloma; PI- proteasome inhibitor; SPM-second primary malignancy;T2DM-. Type 2 diabetes mellitus. Hemoglobin, platelets, albumin, creatinine, B2 Microglobulin levels were measured prior to the initiation of any anti-MM treatment.

**Table S2. (B)Univariate analysis - Factors Predicting Shorter time to HematoSPM only.**

|                                     | HR   | CI95%     | P            |
|-------------------------------------|------|-----------|--------------|
| Age <65<br>≥65(years)               | 2.14 | 1.21-3.80 | <b>0.009</b> |
| Sex (F)<br>M                        | 0.66 | 0.36-1.24 | 0.20         |
| Prior cancer history                | 3.39 | 1.18-9.71 | <b>0.023</b> |
| Concomitant T2DM                    | 2.63 | 0.99-6.98 | 0.052        |
| Number of concomitant comorbidities |      |           |              |
| 0                                   | 0.41 | 0.21-0.81 |              |
| 1                                   | 1.82 | 0.87-3.78 | 0.0.1        |
| 2                                   | 3.61 | 1.57-8.30 | <b>0.003</b> |
| 3                                   | 4.89 | 1.74-13.7 | <b>0.003</b> |
| Hemoglobin ≥12 (gr/dL)              | 0.66 | 0.32-1.39 | 0.28         |
| Creatinine level ≥ 1.3 (mg/dL)      | 1.00 | 0.48-2.07 | >0.99        |
| PLT >150 (10 <sup>9</sup> /L)       | 0.37 | 0.16-0.86 | <b>0.021</b> |
| Albumin level ≥3.5 (g/dL)           | 1.27 | 0.63-2.56 | 0.51         |
| B2Mmicroglobulin ≥ 5.5 (mg/L)       | 0.96 | 0.46-1.99 | 0.91         |
| ISS 1                               |      |           |              |
| 2                                   | 1.20 | 0.51-2.82 | 0.67         |
| 3                                   | 1.09 | 0.5-2.37  | 0.83         |
| Any prior anti-MM chemotherapy      | 0.91 | 0.46-1.81 | 0.79         |
| Any prior IMiD                      | 1.06 | 0.47-2.36 | 0.89         |
| Any prior PI                        | 1.28 | 0.59-2.75 | 0.53         |
| Any maintenance therapy             | 1.17 | 0.67-2.06 | 0.57         |
| Maintenance with IMiD               | 0.51 | 0.28-0.95 | <b>0.032</b> |
| Prior AutoHCT                       | 1.05 | 0.59-1.88 | 0.87         |
| Number of prior lines 1,2 vs >2     | 0.43 | 0.24-0.77 | <b>0.005</b> |
| ECOG PS 0 VS ≥ 1                    | 0.45 | 0.2-1.00  | 0.05         |

AutoHCT- Autologous hematopoietic cell transplantation; B2M- B2 microglobulin; Chemo-chemotherapy; ECOG PS - ECOG Performance Status; IMiD- immunomodulating agents; ISS- International Staging System; PI- proteasome inhibitor; PLT- platelets; SPM-second primary malignancy; T2DM-type 2 diabetes mellitus. Hemoglobin, platelets, creatinine, albumin and B2M levels were measured treatment prior -initiation of any anti- MM treatment. ECOG PS was determined at SPM diagnosis.

**Table S3. Management of SPMs.**

|                            | Number of Patients (%) |
|----------------------------|------------------------|
| <b>Solid SPMs</b>          | <b>113</b>             |
| Supportive                 | 25                     |
| Any antineoplastic therapy | 88                     |
| Surgery only               | 37                     |
| Surgery+ Radiotherapy      | 10                     |
| Surgery+ Systemic therapy  |                        |
| Chemotherapy               | 11                     |

|                                     |           |
|-------------------------------------|-----------|
| Biological                          | 1         |
| Radio only                          | 7         |
| Systemic only                       |           |
| Chemotherapy                        | 13        |
| Biological                          | 7         |
| Systemic+ Radiotherapy              | 2         |
| <b>Hematological SPMs (52)</b>      | <b>52</b> |
| Supportive                          | 7         |
| Watch and Wait                      | 7         |
| Any systemic antineoplastic therapy | 38        |
| Chemotherapy                        | 31        |
| Biological                          | 3         |
| Chemotherapy+ Radiotherapy          | 2         |
| Chemotherapy followed by AlloHCT    | 2         |

AlloHCT- Allogeneic hematopoietic cell transplantation; SPM –Second primary malignancy.

**Table S4.** (A) Detailed characteristic of MM management in response to SPM detection.

| MM Treatment at the time of SPM diagnosis | MM treatment Post SPM | Entire cohort <sup>&amp;</sup><br>(n=100) | Solid cohort <sup>&amp;</sup><br>(n=75) | Hemato cohort <sup>&amp;</sup><br>(n=25) |
|-------------------------------------------|-----------------------|-------------------------------------------|-----------------------------------------|------------------------------------------|
| <b>IMiD</b>                               |                       |                                           |                                         |                                          |
| (n=55);solid-40; Hem-15                   | Discont               | 33                                        | 20                                      | 13                                       |
|                                           | Substituted           | 3                                         | 1                                       | 2                                        |
|                                           | Cont                  | 19                                        | 19                                      | 0                                        |
| <b>IMiD-Chemo</b>                         |                       |                                           |                                         |                                          |
| (n=5);solid-5;Hem-0                       | Discont               | 3                                         | 3                                       | 0                                        |
|                                           | Substituted           | 0                                         | 0                                       | 0                                        |
|                                           | Cont                  | 2                                         | 2                                       | 0                                        |
| <b>PI</b>                                 |                       |                                           |                                         |                                          |
| (n=7); solid-5; Hem-2                     | Discont               | 6                                         | 5                                       | 1                                        |
|                                           | Substituted           | 0                                         | 0                                       | 0                                        |
|                                           | Cont                  | 1                                         | 0                                       | 1                                        |
| <b>IMiD-PI</b>                            |                       |                                           |                                         |                                          |
| (n=5); solid-4; Hem-1                     | Discont               | 2                                         | 1                                       | 1                                        |
|                                           | Substituted           | 0                                         | 0                                       | 0                                        |
|                                           | Cont                  | 3                                         | 3                                       | 0                                        |
| <b>MoAB</b>                               |                       |                                           |                                         |                                          |
| (n=8); solid-6; Hem-2                     | Discont               | 5                                         | 3                                       | 2                                        |
|                                           | Substituted           | 0                                         | 0                                       | 0                                        |
|                                           | Cont                  | 3                                         | 3                                       | 0                                        |
| <b>Chemotherapy</b>                       |                       |                                           |                                         |                                          |
| (n=4); solid-2, Hem-2                     | Discont               | 3                                         | 1                                       | 2                                        |
|                                           | Substituted           | 0                                         | 0                                       | 0                                        |
|                                           | Cont                  | 1                                         | 1                                       | 0                                        |
| <b>Other</b>                              |                       |                                           |                                         |                                          |
|                                           | Discont               | 0                                         | 1                                       | 0                                        |
|                                           | Substituted           | 0                                         | 0                                       | 0                                        |
|                                           | Cont                  | 1                                         | 0                                       | 0                                        |
| <b>Not Determined</b>                     |                       |                                           |                                         |                                          |
| (n=15); solid-12, Hem-3                   | Discont               | 0                                         | 0                                       | 0                                        |
|                                           | Substituted           | 12                                        | 9                                       | 3                                        |
|                                           | Cont                  | 3                                         | 3                                       | 0                                        |

MM – multiple myeloma; SPM – second primary malignancy; IMiD – immunomodulatory drugs, PI – proteasome inhibitors, MoAB – monoclonal antibody. 65 were not receiving anti-MM therapy at the time of SPM diagnosis, including 38 /113 in the solid cohort and 27/52 in the Hemato cohort.

**Table S4. (B) . Univariate analysis - Factors Predicting OS since SPM diagnosis for the entire cohort (n=165).**

|                                 | HR   | CI95%     | P                |
|---------------------------------|------|-----------|------------------|
| Age <65                         |      |           |                  |
| ≥65                             | 1.09 | 0.72-1.64 | 0.68             |
| Sex F                           |      |           |                  |
| M                               | 0.74 | 0.49-1.12 | 0.16             |
| Prior cancer history            | 1.70 | 0.85-3.40 | 0.13             |
| Any prior Chemo                 | 1.29 | 0.80-2.08 | 0.30             |
| Any prior IMiD                  | 1.45 | 0.78-2.69 | 0.24             |
| Any prior Pi                    | 1.02 | 0.65-1.60 | 0.95             |
| Any maintenance therapy         | 0.57 | 0.37-0.90 | <b>0.015</b>     |
| Prior AutoHCT                   | 0.68 | 0.44-1.03 | 0.067            |
| Number of prior lines 1,2 vs >2 | 1.61 | 1.07-2.43 | <b>0.022</b>     |
| Creatinine level <1.3           | 0.59 | 0.37-0.93 | <b>0.023</b>     |
| ≥ 1.3 (mg/dl)                   |      |           |                  |
| PLT <150                        |      |           |                  |
| >150 (G/L)                      | 0.74 | 0.40-1.35 | 0.32             |
| SPM type Solid                  |      |           |                  |
| Hemato                          | 1.25 | 0.80-1.96 | 0.33             |
| Albumin level <3.5              |      |           |                  |
| ≥3.5 (g/dl)                     | 0.83 | 0.52-1.32 | 0.43             |
| B2Mmicroglobulin <5.5           | 0.63 | 0.38-1.04 | 0.069            |
| ≥ 5.5                           |      |           |                  |
| ISS 1                           |      |           |                  |
| 2                               | 1.43 | 0.78-2.63 | 0.25             |
| 3                               | 1.71 | 0.97-3.00 | 0.064            |
| ECOG PS 0                       |      |           |                  |
| 1                               | 3.00 | 1.42-6.36 | <b>0.004</b>     |
| 2                               | 5.86 | 2.68-12.8 | <b>&lt;0.001</b> |
| 3                               | 6.80 | 2.59-17.8 | <b>&lt;0.001</b> |
| No concomitant comorbidities    | 0.75 | 0.47-1.19 | 0.23             |
| Concomitant comorbidities 0     |      |           |                  |
| 1                               | 1.70 | 1.0-2.89  | 0.05             |
| 2                               | 1.12 | 0.62-2.0  | 0.71             |
| 3                               | 1.12 | 0.60-2.11 | 0.72             |
| Concomitant diabetes            | 1.29 | 0.78-2.12 | 0.32             |
| Concomitant HT                  | 0.96 | 0.64-1.45 | 0.85             |
| Hemoglobin <12                  |      |           |                  |
| ≥12 (g/dl)                      | 0.52 | 0.32-0.86 | <b>0.010</b>     |
| Maintenance after 1 Line        | 0.58 | 0.35-0.96 | <b>0.036</b>     |

**Table S4. (C). Univariate analysis - Factors Predicting OS since SPM diagnosis (excluding MM deaths).**

|             | HR   | CI95%     | P    |
|-------------|------|-----------|------|
| Age <65     |      |           |      |
| ≥65 (years) | 1.11 | 0.7-1.76  | 0.65 |
| Sex (F)     |      |           |      |
| M           | 0.77 | 0.48-1.22 | 0.26 |

|                                   |      |           |                  |
|-----------------------------------|------|-----------|------------------|
| Prior cancer history              | 1.95 | 0.84-4.52 | 0.12             |
| Any prior Chemotherapy            | 1.24 | 0.72-2.15 | 0.43             |
| Any prior IMiD                    | 1.58 | 0.77-3.24 | 0.21             |
| Any prior PI                      | 0.85 | 0.51-1.43 | 0.54             |
| Any maintenance therapy           | 0.60 | 0.37-0.98 | <b>0.041</b>     |
| Prior AutoHCT                     | 0.64 | 0.40-1.02 | 0.062            |
| Number of prior lines 1,2 vs >2   | 1.41 | 0.88-2.25 | 0.15             |
| Creatinine level $\geq$ 1.3 mg/dL | 1.73 | 1.05-2.85 | <b>0.032</b>     |
| Platelets $>150 \times 10^9/L$    | 0.82 | 0.43-1.59 | 0.57             |
| SPM type (solid)                  |      |           |                  |
| Hematological                     | 1.13 | 0.68-1.88 | 0.63             |
| Albumin level                     |      |           |                  |
| $\geq 3.5$ (g/dL)                 | 0.86 | 0.51-1.46 | 0.58             |
| B <sub>2</sub> Mmicroglobulin     |      |           |                  |
| $\geq 5.5$ (mg/L)                 | 1.54 | 0.89-2.66 | 0.12             |
| ISS (1)                           |      |           |                  |
| 2                                 | 1.37 | 0.68-2.78 | 0.38             |
| 3                                 | 1.74 | 0.91-3.33 | 0.10             |
|                                   | 0.26 | 0.12-0.55 | <b>&lt;0.001</b> |
| ECOG PS 0 vs $\geq 1$             | 2.91 | 1.30-6.52 | <b>0.009</b>     |
|                                   | 5.42 | 2.35-12.5 | <b>&lt;0.001</b> |
|                                   | 7.88 | 2.8-22.2  | <b>&lt;0.001</b> |
| Concomitant comorbidities 0       | 0.75 | 0.44-1.29 | 0.3              |
| 1                                 | 1.73 | 0.94-3.16 | 0.077            |
| 2                                 | 1.05 | 0.54-2.07 | 0.88             |
| 3                                 | 1.17 | 0.58-2.36 | 0.66             |
| Concomitant T2DM                  | 1.23 | 0.71-2.13 | 0.45             |
| Hemoglobin $\geq 12$ g/dL         | 0.51 | 0.30-0.89 | <b>0.017</b>     |
| Any maintenance therapy           | 0.54 | 0.32-0.92 | <b>0.023</b>     |

AutoHCT- Autologous hematopoietic cell transplantation; B2M- B<sub>2</sub> Microglobulin; ECOG PS - ECOG performance status; HT- hypertension ;IMiD- immunomodulating agents; ISS- International Staging System; T2DM- Type 2 diabetes mellitus; PI- proteasome inhibitor; SPM-second primary malignancy.
